# Supplementary material for: Nano Random Forests to mine protein complexes and their relationships in quantitative proteomics data
Source: PubMed Central journal article supplement — Mol Biol Cell. 2017 Mar 1;28(5):673–80. doi: 10.1091/mbc.E16-06-0370 (PMC5328625; doi:10.1091/mbc.e16-06-0370), 2017-03-01
Supplement: supp_E16-06-0370v1_CombinedSupMats.pdf [file supp_E16-06-0370v1_CombinedSupMats.pdf]

# Supplemental Materials

*Molecular Biology of the Cell*

Montaño-Gutierrez et al.

Supplemental information for

**Nano Random Forests to mine protein complexes and their relationships  
in quantitative proteomics data**

*Luis F. Montaña-Gutierrez<sup>1</sup>, Shinya Ohta<sup>1,2</sup>, Georg Kustatscher<sup>1</sup>,*

*William C. Earnshaw<sup>1,\*</sup>, Juri Rappsilber<sup>1,3,\*</sup>*

**Figure S1. Expanded version of 2D interdependency plots in Fig 3C(A) and 3D(B) shows proteins with functional association to either complex.** A. Expanded version of 3C. Green list corresponds to proteins (histones) in green circle cluster. B. Expanded version of 3D. Names were slightly moved to avoid overlap.

**Figure S2. 2D interdependency plot between the Constitutive Centomere-Associated Network (CCAN, X axis, squares) and the ribosomal protein group (Y axis, triangles).**

**Table S1. nanoRF proteomics results table.** Grey columns: the training factors used for each complex's nanoRF where 'T'= member of a complex, 'F'= hitchhiker, and '?'= unknown, proteins that are uncalled as any specific class. Orange Columns: the SILAC ratio columns used from the mitotic chromosome proteomics experiments, b) Colourless columns: each RF scores for each complex. Red-coloured entries are proteins that surpass each RF's cutoff score—i.e. they are significantly associated with the complex.

**Table S2. Information about protein complexes and associations.** Relevant information about the complex composition and statistics (MCC, AUC, RF cutoffs, hypergeometric tests).

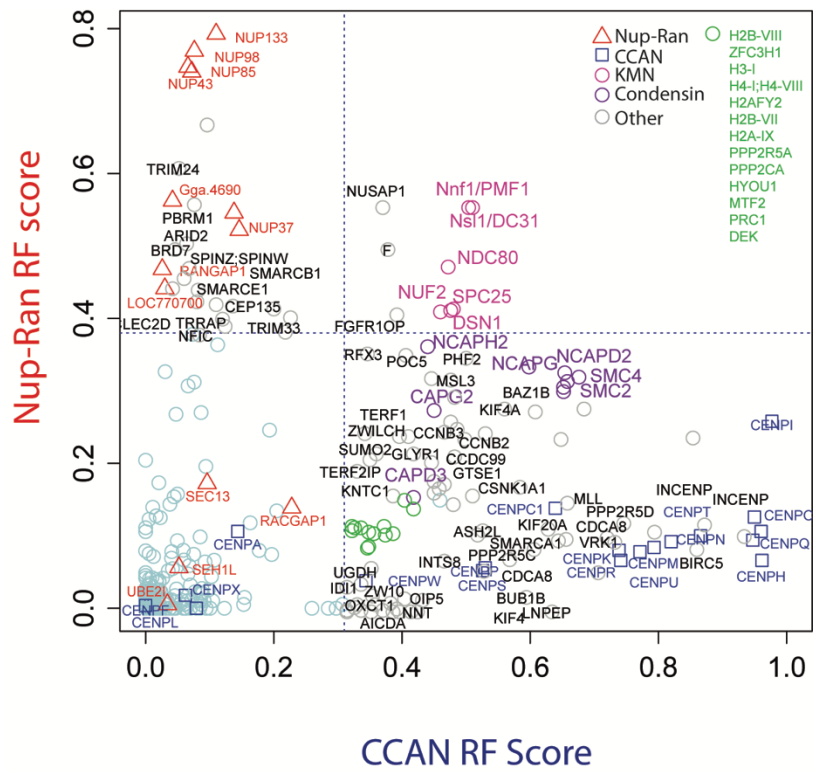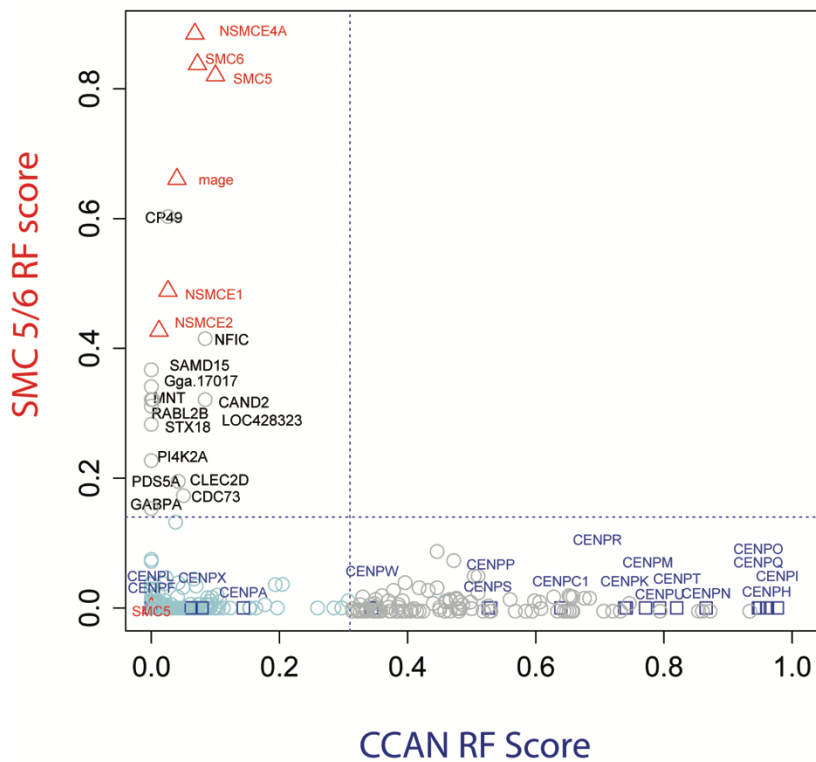

Montaño-Gutierrez et al. Figure S1

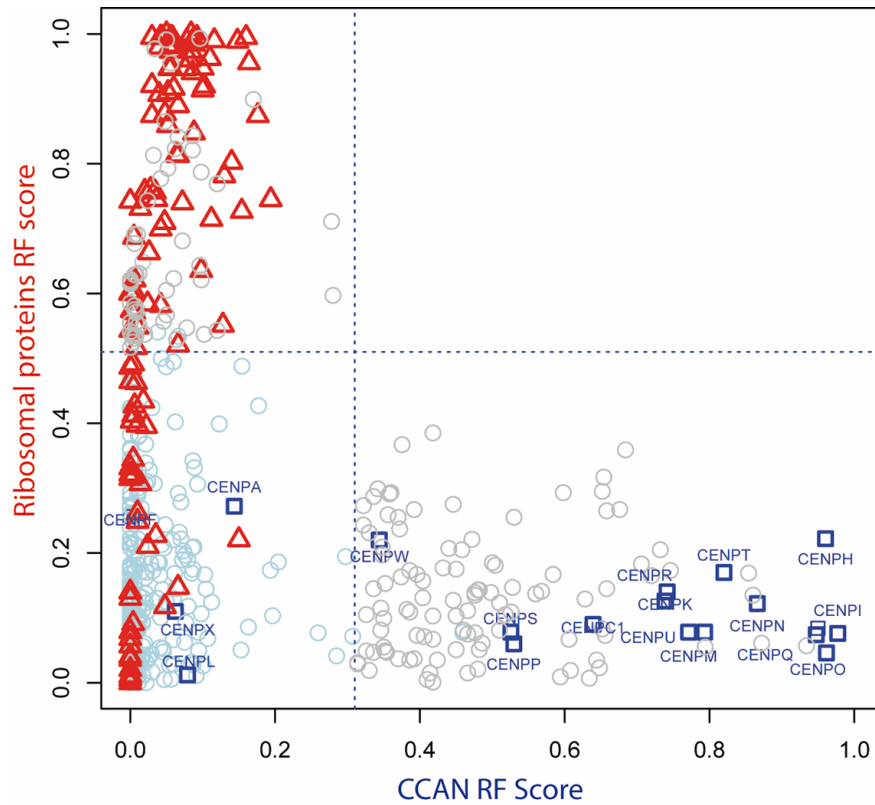

Ribosome class, significant ( $\Delta$ ) .-

|        |               |        |        |         |            |       |        |
|--------|---------------|--------|--------|---------|------------|-------|--------|
| RPS15  | RPL13         | RPL35  | RPL23  | MRPS17  | RPS28      | RPL39 |        |
| RPS21  | RPL8          | RPL7   | RPS17  | MRPS18A | RPL22      | RPS25 | MRPS5  |
| RPS15A | RPL7A         | RPL12  | RPS3   | MRPS30  | RPL37      | RPS13 | MRPL19 |
| RPS24  | RPL27A        | MRPL2  | MRPL38 | MRPS25  | RPS12      | RPS7  | MRPL3  |
| RPS10  | RPL9          | RPLP1  | MRPS11 | MRPS26  | RPL35A     |       |        |
| RPL5   | RPL31         | MRPS22 | MRPL18 | RPS8    | RPL23A     |       |        |
| RPL10  | RPL17         | RPS3A  | MRPL44 | RPS20   | MRPS27     |       |        |
| RPL36  | RPL15         |        | RPLP0  | MRPL46  | MRPL48     |       |        |
| RPS29  | RPS14         |        | RPL11  | MRPL15  | RPSA       |       |        |
| RPS11  | RPL26L1;RPL26 |        | RPL27  | RPS23   | MRPS16     |       |        |
|        |               |        | RPL6   | RPL24   | RPS4X;RPS4 |       |        |

Ribosome class, significant associated .-

|              |                |           |
|--------------|----------------|-----------|
| C2H18orf8    | LOC100858795   | REV3L     |
| GNB2L1       | SERBP1         | DCAF12    |
| EAF2         | GTPBP10        | Gga.22411 |
| LOC100858238 | RC.JMB04_14e22 | HADHB     |
| PTCD3        | PWP1           | PDCD2     |
| EDEM3        | LLPH           | COX6C     |
| NAP1L1       | GLUD1          | RG9MTD1   |
| SRP14        | GNL3           | FILIP1    |
| KIF13A       | Gga.53205      | YTHDC1    |
| DNAJC21      | NFIX           | FECH      |
| GOLIM4       | SEC23IP        | TMEM111   |
| LOC100859914 | RPF1           | UBQLN1    |
| GLUD1        | MBD4           | SMN       |
|              | MINA           |           |
